# Supplementary material for: Thermoprotection in the perioperative period: an international consensus statement for the maintenance of normothermia
Source: Research Square preprint supplement (doi:10.21203/rs.3.rs-8688093/v1), 2026-02-04
Supplement: Supplementary file 1 [file 457c272f769cc53ce20dd707.docx]

**Supplementary Material 1**

**Designing the panel and voting methodology**

**Expert panel composition**

Global expert panel for the International Consensus on Perioperative Thermoprotection was composed of recognized international leaders in perioperative medicine, anesthesiology, surgery, critical care and patient blood management as well as the world-leading organizations in perioperative quality and safety as well as world-leading organizations in perioperative quality and safety. The panelists were chosen for their clinical experience, academic contribution, involvement in developing guidelines, and their representation in various healthcare and geographic systems.

This panel comprised experts from countries around the world and practice environments (academic hospitals, tertiary referral centers, and community institutions) broadening the recommendations’ applicability across diverse resource environments. We aimed for multidisciplinary representation to better reflect the collaborative aspect of perioperative thermoprotection involving anesthesiologists, surgeons, perioperative nurses, and various stakeholders of perioperative care.

**Consensus development process**

The consensus process was following a systematic, iterative process informed by recognized frameworks for expert consensus building. A first draft of recommendations and rationale was prepared by the writing group from an extensive reading of scientific literature.

These initial recommendations were circulated electronically with each panel member to enable independent review. Panelists considered each recommendation in a Likert-scale agreement framework, selecting one of the following options:

- Completely agree
- Partially agree
- Neutral
- Partially disagree
- Strongly disagree

We asked panelists to submit a free-text comment upon selecting any reply other than “completely agree”–especially for clarifications, refinements and implementation choices. Definition of agreement, and response to feedback.

**Definition of agreement and response to feedback**

Levels of agreement were quantitatively summarized for each recommendation. Recommendations with a high ratio of “completely agree” responses, with no substantive disagreement, were deemed by the authors to have reached consensus. When panel members had comments or chose either “partially agree” or “neutral,” the writing group examined all feedback in detail. These comments only considered changes that were consistent, methodologically justified and consistent with the evidence base.

Modifications were restricted to wording alterations that aimed to enhance clarity, feasibility and proportionality or congruence with clinical application and did not modify the intent or scope of the recommendations. Notably, no recommendations required increasing the strength of evidence or voting based on feedback from the panel for re-verification. Recommendations that reached unanimous agreement were not updated.

**Voting transparency and record keeping**

The responses to every vote, along with free-text comments, were archived as well as stored in their voting response. Aggregated votes informed the final words used to formulate each recommendation, as summarized in Supplementary Table S1. This kind of clear documentation facilitated traceability between feedback received by Panel and the final recommendations provided, lending added rigor and credibility to the recommendations process.

**Role of the writing group**

The writing group synthesized the panel feedback, applied reasonable adjustments where justified, and endorsed the adjusted recommendations. This was how the writing group synthesized the panel feedback with coherent recommendations. Final wording decisions were made by consensus within the writing group, the opinion of panels providing guidance and guidelines regarding language use and procedure, without third-party sponsors/conflicts of interest.

**Ethical considerations**

The consensus process was voluntary. As subject-matter experts, panelists reviewed and contributed to recommendations, and no patient-level data were collected or analyzed to inform this consensus development.

**Supplementary Material 2.**

**Details of feedback by panelists and responses**

**RECOMMENDATION # 1**

**Original statement**: Recommendation 1. Institutions should establish formal standards and policies for the prevention of unintentional perioperative hypothermia as an integral component of perioperative patient-safety programs (Grade 1B).

**Original rationale:** Unintentional perioperative hypothermia (UPH) is a frequent condition in institutions lacking formal prevention policies, with reported incidences of up to 70%. Its association with adverse perioperative events and poor clinical outcomes has been consistently described. Experimental and clinical studies demonstrate that UPH is associated with marked increases in plasma catecholamine concentrations, autonomic hyperactivity, dysregulation of cortisol levels, and impairment of the myocardial oxygen supply–demand balance. These physiological disturbances provide a mechanistic basis for the observed association between UPH and an increased risk of acute myocardial infarction, cardiac arrhythmias, and other major cardiovascular events (13–17).

From a hematologic and economic perspective, early and contemporary meta-analyses have shown that the absence of structured hypothermia-prevention protocols is associated with increased bleeding, higher transfusion rates, and greater healthcare costs. Preservation of perioperative normothermia has been associated with a significant reduction in transfusion exposure, with a reported relative risk reduction of approximately 22% [RR 0.78 (95% CI 0.63–0.97)], reinforcing the clinical and economic relevance of institutional thermoprotection strategies [(15–17)](https://www.zotero.org/google-docs/?1oCAq1).

Data regarding the association between UPH and surgical site infection remain heterogeneous. While most physiological and translational studies describe impaired tissue perfusion and altered immune cell function under hypothermic conditions, recent meta-analyses have not demonstrated a statistically significant reduction in surgical site infection rates among normothermic patients [(18,19)](https://www.zotero.org/google-docs/?LCQkzg) [(20)](https://www.zotero.org/google-docs/?tTWEz2). This variability underscores the complexity of infection-related outcomes and the influence of multiple perioperative factors beyond temperature alone.

Importantly, UPH has a substantial impact on patient experience. Thermal discomfort adversely affects patients’ perception of care and may contribute to prolonged stays in the post-anesthesia care unit [(21)](https://www.zotero.org/google-docs/?i0CJZq). UPH is also an independent contributor to postoperative shivering, which is associated with increases in oxygen consumption of up to 105%, with only minimal compensatory increases in oxygen delivery, resulting in a clinically relevant supply–demand imbalance [(22,23)](https://www.zotero.org/google-docs/?jAGBQg). Together, these findings support the implementation of institutional policies for UPH prevention as a patient-safety, quality-of-care, and resource-optimization measure.

**Verbatim:** For Recommendation 1, agreement was high, with 11 of 12 panelists (91%) indicating strong agreement and one panelist indicating partial agreement. No neutral or negative responses were recorded. The single partially agreeing panelist did not challenge the direction, evidence base, or strength of the recommendation but suggested refinement of the wording to more explicitly emphasize sustainability, accountability, and ongoing implementation. Specifically, the panelist proposed reinforcing the need for maintenance, monitoring, and system-level accountability beyond one-time policy adoption.

In line with ACCORD guidance, the writing group reviewed this feedback and determined that it represented a constructive clarification rather than a substantive disagreement. Given the high level of consensus and the alignment of the suggestion with contemporary patient-safety and quality-improvement frameworks, the recommendation wording was refined to incorporate the concepts of sustained implementation and quality assurance, without altering its scope, intent, or GRADE strength. No re-voting was deemed necessary, as the modification did not materially change the recommendation and preserved full panel consensus. The final wording reflects both the strong agreement of the panel and an explicit systems-based framing intended to support durable implementation across diverse institutional contexts.

**Final version:** *Recommendation 1* Institutions **are required to** **develop** **and implement** formal standards and policies for the prevention of unintentional perioperative hypothermia, **including mechanisms for monitoring and quality assurance**, as an integral component of perioperative patient-safety programs (Grade 1B).

**Final version of rationale:** Unintentional perioperative hypothermia (UPH) is a **common** condition in institutions lacking formal prevention policies, with reported incidences of up to 70%. Its association with adverse perioperative events and poor clinical outcomes has been consistently described. Experimental and clinical studies demonstrate that UPH is associated with marked increases in plasma catecholamine concentrations, autonomic hyperactivity, dysregulation of cortisol levels, and impairment of the myocardial oxygen supply–demand balance. These physiological disturbances provide a mechanistic basis for the observed association between UPH and an increased risk of acute myocardial infarction, cardiac arrhythmias, and other major cardiovascular events (13–17).

From a hematologic and economic perspective, early and contemporary meta-analyses have shown that the absence of structured hypothermia-prevention protocols is associated with increased bleeding, higher transfusion rates, and greater healthcare costs. Preservation of perioperative normothermia has been associated with a significant reduction in transfusion exposure, with a reported relative risk reduction of approximately 22% [RR 0.78 (95% CI 0.63–0.97)], reinforcing the clinical and economic relevance of institutional thermoprotection strategies [(15–17)](https://www.zotero.org/google-docs/?1oCAq1).

Data regarding the association between UPH and surgical site infection remain heterogeneous. While most physiological and translational studies describe impaired tissue perfusion and altered immune cell function under hypothermic conditions, recent meta-analyses have not demonstrated a statistically significant reduction in surgical site infection rates among normothermic patients [(18,19)](https://www.zotero.org/google-docs/?LCQkzg) [(20)](https://www.zotero.org/google-docs/?tTWEz2). This variability **highlights** the complexity of infection-related outcomes and the influence of multiple perioperative factors beyond temperature alone.

Importantly, UPH has a substantial impact on patient experience. Thermal discomfort adversely affects patients’ perception of care and may contribute to prolonged stays in the post-anesthesia care unit [(21)](https://www.zotero.org/google-docs/?i0CJZq). UPH is also an independent contributor to postoperative shivering, which is associated with increases in oxygen consumption of up to 105%, with only minimal compensatory increases in oxygen delivery, resulting in a clinically relevant supply–demand imbalance [(22,23)](https://www.zotero.org/google-docs/?jAGBQg).

**Collectively, these findings support the implementation of institutional policies for UPH prevention as a patient-safety, quality-of-care, and resource-optimization measure, underscoring that their impact depends not just on policy adoption, but on ongoing implementation, regular monitoring, and integration into continuous quality-improvement efforts.**

**RECOMMENDATION # 2**

**Original statement:** *Recommendation 2.*  Institutions should incorporate structured perioperative thermoprotection strategies into enhanced recovery pathways and patient blood management programs (Grade 1B).

**Original rationale:** Institutional policies aimed at maintaining perioperative normothermia have been shown to significantly influence healthcare utilization and costs. Economic analyses estimate that perioperative hypothermia is associated with substantial excess expenditure, with annual additional costs exceeding US$1.25 billion in large healthcare systems [(24)](https://www.zotero.org/google-docs/?3Nwr5o). Conversely, preventive strategies for UPH have been associated not only with cost savings but also with gains in health outcomes, including an estimated increase of 54 quality-adjusted life years in modeled analyses [(25)](https://www.zotero.org/google-docs/?7QJcIE).

Observational data further highlight important gaps in routine practice. In a large cohort evaluating perioperative temperature monitoring, more than half of patients had fewer than two documented temperature assessments throughout the perioperative period, emphasizing that hypothermia prevention is not solely a technological issue but also a systems and process-of-care challenge [(26)](https://www.zotero.org/google-docs/?Kya3f3). Embedding thermoprotection within structured programs such as enhanced recovery pathways and patient blood management initiatives promotes consistent monitoring, protocol adherence, and multidisciplinary accountability [(27)](https://www.zotero.org/google-docs/?cagTbv).

From a clinical standpoint, the association between hypothermia, bleeding, and transfusion exposure is well supported. A meta-analysis including 14 studies, and 1,219 patients demonstrated that mild hypothermia (34–36 °C) increases blood loss by an average of 16% and raises the relative risk of transfusion by approximately 22%[(17)](https://www.zotero.org/google-docs/?b8JlS1). These findings are consistent with earlier randomized clinical trials showing significantly greater intraoperative and postoperative blood loss in hypothermic patients compared with those in whom normothermia was maintained [(28)](https://www.zotero.org/google-docs/?nDF9k5).

**Verbatim:** Recommendation 2 achieved unanimous agreement among panelists, and no modifications were required.

**RECOMMENDATION # 3**

**Original statement:** “*Within perioperative quality-assurance programs, institutions should ensure active control of operating room ambient temperature, targeting a minimum of 21–23 °C for adult patients and ≥24 °C for pediatric patients during periods of patient exposure, with appropriate adjustments based on patient population, procedure, and clinical context (Grade 1C)*.”

**Original rationale:** Ambient operating room temperature is a modifiable determinant of perioperative heat loss and plays a particularly important role during periods of patient exposure and prior to the initiation of active warming. A systematic review published in 2015 concluded that operating room temperature should be maintained at a minimum of 21 °C for adult patients and 24 °C for paediatric patients while they are exposed. Once effective active warming strategies are established, ambient temperature may be reduced to improve working conditions for the surgical team without compromising patient thermal balance (29).

Standard environmental requirements for operating rooms include a minimum of 20 air exchanges per hour and relative humidity levels between 20% and 60%, supporting both thermal regulation and infection control. However, specific clinical contexts require tailored adjustments. Lower ambient temperatures may be acceptable during cardiac surgery, where temperatures as low as 17 °C have been described, whereas higher temperatures are often required for paediatric surgery and in patients with extensive burns, in whom ambient temperatures of up to 27 °C may be necessary to limit heat loss. In obstetric settings, the World Health Organization recommends maintaining operating room temperatures between 25 °C and 28 °C to reduce the risk of neonatal hypothermia (30,31).

Operating rooms are inherently multidisciplinary environments with competing thermal requirements. Environmental temperature management must therefore balance patient safety with staff comfort and performance. Evidence from controlled clinical studies indicates that ambient temperatures exceeding 23 °C may be associated with significant discomfort and impaired performance among surgical staff. These findings highlight the importance of adopting flexible, patient-cantered environmental temperature targets that prioritize patient exposure periods while incorporating active warming strategies to allow subsequent adjustment of ambient conditions (32).

**Verbatim:** For Recommendation 3, two panellists indicated partial agreement and provided comments related to interpretation and feasibility of operating room ambient temperature control. One panellist suggested emphasizing exposure-focused temperature management and clarifying that recommended temperature ranges should be adjusted once effective active warming is established, to balance patient thermal protection with staff comfort and performance. A second panellist highlighted practical limitations related to centralized HVAC systems, airflow requirements, and engineering constraints, noting that environmental temperature control may not be uniformly achievable in all settings.

The writing group considered these comments constructive and aligned with the existing evidence base. The recommendation wording was therefore refined to emphasize exposure-focused management, clarify that numeric temperature ranges represent commonly recommended targets rather than rigid mandates, and explicitly state adjustment following initiation of active warming. In addition, the rationale was expanded to acknowledge infrastructure-related constraints and to reinforce that ambient temperature management is a complementary measure that does not replace patient-level active warming strategies. These refinements did not alter the intent, scope, or GRADE strength of the recommendation, and re-voting was not required.

**Final version:** *Recommendation 3.* Within perioperative quality-assurance programs, institutions should ensure, **active, exposure-focused management** of operating room ambient temperature, **targeting approximately** 21–23 °C for adult patients and ≥24 °C for pediatric patients during periods of patient exposure, **with subsequent adjustment once effective active warming strategies are established, taking into account** patient population, procedure, and clinical context (Grade 1C).

**Final version of rationale:** Ambient operating room temperature is a modifiable determinant of perioperative heat loss and plays a particularly important role during periods of patient exposure and prior to the initiation of active warming. **Evidence supports maintaining higher ambient temperatures during these phases to reduce early heat loss, especially in vulnerable populations.**

A systematic review published in 2015 concluded that operating room temperature**s** should be maintained at a minimum of 21 °C for adult patients and 24 °C for pediatric patients while they are exposed. Once effective active warming strategies are established, ambient temperature may be reduced to improve working conditions for the surgical team without compromising patient thermal balance [(29)](https://www.zotero.org/google-docs/?SHa3KJ).

**It should be recognized that the degree of control over operating room ambient temperature varies across institutions and may be constrained by centralized HVAC systems, thermal inertia, airflow requirements, and predefined environmental ranges. From a systems and engineering perspective, ambient temperature management should therefore be regarded as a complementary strategy that supports (but does not replace) patient-level active warming and temperature monitoring, particularly in settings where frequent environmental adjustments are not feasible.**

Standard environmental requirements for operating rooms include a minimum of 20 air exchanges per hour and relative humidity levels between 20% and 60%, supporting both thermal regulation and infection control. However, specific clinical contexts require tailored adjustments. Lower ambient temperatures may be acceptable during cardiac surgery, where temperatures as low as 17 °C have been described, whereas higher temperatures are often required for pediatric surgery and in patients with extensive burns, in whom ambient temperatures of up to 27 °C may be necessary to limit heat loss. In obstetric settings, the World Health Organization recommends maintaining operating room temperatures between 25 °C and 28 °C to reduce the risk of neonatal hypothermia [(30,31)](https://www.zotero.org/google-docs/?P0yBm8).

Operating rooms are inherently multidisciplinary environments with competing thermal requirements. Environmental temperature management must therefore balance patient safety with staff comfort and performance. **Controlled clinical studies indicate that ambient temperatures exceeding 23 °C may be associated with staff discomfort and impaired performance, reinforcing the importance of flexible, patient-centered environmental temperature targets that prioritize periods of patient exposure and allow subsequent adjustment once active warming is in place** [(32)](https://www.zotero.org/google-docs/?VPzLs9).

**RECOMMENDATION # 4**

**Original statement:** *Recommendation 4.* Institutions should establish standardized criteria to identify patients at increased risk of unintentional perioperative hypothermia (Grade 1C).

**Original rationale:** Identification of patients at increased risk of UPH is a critical prerequisite for targeted prevention strategies. A systematic review and meta-analysis including over 15,000 patients identified several independent risk factors associated with the development of UPH. These include advanced age, low body mass index, elevated preoperative heart rate and systolic blood pressure, and prolonged duration of anesthesia, particularly procedures exceeding two hours. These factors reflect reduced thermal reserve, altered vasomotor responses, and increased exposure to anesthetic-induced heat redistribution [(33)](https://www.zotero.org/google-docs/?K1esMG).

Procedure-related factors also influence hypothermia risk. Observational and cohort studies have consistently reported higher rates of UPH in patients undergoing abdominal, gastrointestinal, and gynecological surgery, as well as in those exposed to large surgical fields, prolonged operative times, or significant fluid shifts. Environmental conditions, including lower operating room temperatures, have been identified as modifiable contributors, whereas maintaining ambient temperatures within recommended ranges appears protective [(34)](https://www.zotero.org/google-docs/?d5xn9C).

Importantly, perioperative hypothermia has been linked not only to immediate physiological derangements but also to downstream complications. Prospective cohort data suggest that admission to the operating room with a core temperature near 36 °C, followed by a cumulative intraoperative temperature decrease of approximately 2 °C, is associated with an increased risk of surgical site infection [(35)](https://www.zotero.org/google-docs/?WHdw2v). These findings highlight the interaction between baseline thermal status and intraoperative heat loss in determining clinical outcomes.

Systematic risk stratification enables prioritization of monitoring intensity and early implementation of thermoprotection measures in vulnerable patients. Incorporating hypothermia risk assessment into routine perioperative workflows supports more efficient allocation of resources, reduces preventable complications, and reinforces temperature management as a proactive component of perioperative safety.

**Verbatim**: For Recommendation 4, one panelist who partially agreed suggested clarifying the intent of risk identification by explicitly linking standardized criteria to subsequent clinical actions. The writing group considered this feedback constructive and aligned with the underlying rationale of the recommendation. The wording was therefore refined to emphasize that risk identification is intended to guide targeted monitoring and thermoprotection strategies, without altering the scope, strength, or GRADE classification of the recommendation. Given the high level of agreement and the non-substantive nature of the refinement, re-voting was not required.

**Final version:** *Recommendation 4.* Institutions should establish standardized criteria **or processes** to identify patients at increased risk of unintentional perioperative hypothermia, **in order to guide targeted monitoring and thermoprotection strategies** (Grade 1C).

**Final version of rationale:** Identification of patients at increased risk of UPH is a critical prerequisite for **targeted monitoring** and prevention strategies. A systematic review and meta-analysis including over 15,000 patients identified several independent risk factors associated with the development of UPH. These include advanced age, low body mass index, elevated preoperative heart rate and systolic blood pressure, and prolonged duration of anesthesia, particularly procedures exceeding two hours. These factors reflect reduced thermal reserve, altered vasomotor responses, and increased exposure to anesthetic-induced heat redistribution [(33)](https://www.zotero.org/google-docs/?K1esMG).

Procedure-related factors also influence hypothermia risk. Observational and cohort studies have consistently reported higher rates of UPH in patients undergoing abdominal, gastrointestinal, and gynecological surgery, as well as in those exposed to large surgical fields, prolonged operative times, or significant fluid shifts. Environmental conditions, including lower operating room temperatures, have been identified as modifiable contributors, whereas maintaining ambient temperatures within recommended ranges appears protective [(34)](https://www.zotero.org/google-docs/?d5xn9C).

Importantly, perioperative hypothermia has been linked not only to immediate physiological derangements but also to downstream complications. Prospective cohort data suggest that admission to the operating room with a core temperature near 36 °C, followed by a cumulative intraoperative temperature decrease of approximately 2 °C, is associated with an increased risk of surgical site infection [(35)](https://www.zotero.org/google-docs/?WHdw2v). These findings highlight the interaction between baseline thermal status and intraoperative heat loss in determining clinical outcomes.

Systematic risk stratification enables prioritization of monitoring intensity and early implementation of thermoprotection measures in vulnerable patients. Incorporating hypothermia risk assessment into routine perioperative workflows supports more efficient allocation of resources, reduces preventable complications, and reinforces temperature management as a proactive component of perioperative safety.

**RECOMMENDATION # 5**

**Original statement:** *Recommendation 5.* Intraoperative body temperature should be monitored using validated core temperature measurement methods whenever feasible. Non-invasive continuous technologies based on transcutaneous thermal gradients may be used as complementary alternatives when invasive monitoring is not indicated or feasible (Grade 1C).

**Original rationale:** Accurate measurement of core body temperature is fundamental for the early detection and prevention of UPH. Intraoperative hypothermia often develops insidiously and may remain unrecognized without systematic monitoring, particularly during general and neuraxial anesthesia, where thermoregulatory responses are blunted.

In critically ill and anesthetized patients, esophageal and intravesical temperature monitoring provide reliable estimates of core temperature and demonstrate minimal variability when compared with pulmonary artery measurements [(36)](https://www.zotero.org/google-docs/?qQ5zz2). These methods are therefore considered reference standards in settings where invasive monitoring is clinically justified. Rectal thermometry may offer acceptable accuracy but is generally considered a secondary option due to delayed responsiveness and practical limitations. In contrast, axillary and temporal measurements, including infrared tympanic devices, show greater variability and reduced reliability in the intraoperative setting and are not recommended as primary monitoring modalities [(37)](https://www.zotero.org/google-docs/?GnGEFM).

In perioperative practice, nasopharyngeal temperature monitoring has demonstrated good correlation with esophageal measurements and allows early detection of UPH when appropriately positioned. However, the invasiveness of traditional core monitoring methods may limit their use in low-risk procedures, short cases, or ambulatory surgery [(38)](https://www.zotero.org/google-docs/?Bbpy1i).

Recent advances in non-invasive continuous temperature monitoring, including zero-heat-flux (ZHF) technologies, have demonstrated good agreement with esophageal temperature, with minimal bias and narrow limits of agreement. These systems allow continuous monitoring without the risks associated with invasive probes and may improve adherence to temperature monitoring standards, particularly in patients undergoing moderate-risk procedures or regional anesthesia [(39)](https://www.zotero.org/google-docs/?aIxIBp) [(36,40,41)](https://www.zotero.org/google-docs/?Gy564O).

Overall, systematic intraoperative temperature monitoring, preferably continuous and using validated core or near-core methods, is essential to guide timely thermoprotection interventions, reduce the incidence of UPH, and support temperature-based quality-assurance initiatives.

**Verbatim:** For Recommendation 5, two panelists who partially agreed raised implementation-related considerations. One noted that routine invasive monitoring may not be proportionate in short procedures or cases under monitored anesthesia care. Another highlighted the need for clearer positioning of validated non-invasive continuous technologies, emphasizing feasibility, cost-effectiveness, and challenges in standardization when performance thresholds are not defined.

The writing group considered these comments constructive and aligned with current perioperative practice. The recommendation was therefore refined to emphasize proportional, risk-based selection of monitoring modalities and to clarify that validated non-invasive continuous technologies represent appropriate alternatives when invasive monitoring is not indicated or feasible. The rationale was expanded to explicitly address feasibility, risk–benefit balance, and implementation considerations, without altering the scope, intent, or GRADE classification of the recommendation. Re-voting was not required.

**Final version:** *Recommendation 5.* Intraoperative body temperature should be monitored using validated core **or near-core** temperature measurement methods whenever feasible. **Validated** non-invasive continuous technologies may be used as **appropriate** alternatives when invasive monitoring is not indicated, **practical** or proportionate to procedural risk (Grade 1C).

**Final version of rationale:** Accurate measurement of core body temperature is fundamental for the early detection and prevention of UPH. Hypothermia often develops insidiously and may remain unrecognized without systematic monitoring, particularly during general and neuraxial anesthesia, where thermoregulatory responses are blunted.

In critically ill and anesthetized patients, esophageal and intravesical temperature monitoring provide reliable estimates of core temperature and demonstrate minimal variability when compared with pulmonary artery measurements [(36)](https://www.zotero.org/google-docs/?qQ5zz2). These methods are therefore considered reference standards in settings where invasive monitoring is clinically justified. Rectal thermometry may offer acceptable accuracy but is generally considered a secondary option due to delayed responsiveness and practical limitations. In contrast, axillary and temporal measurements, including infrared tympanic devices, show greater variability and reduced reliability in the intraoperative setting and are not recommended as primary monitoring modalities [(37)](https://www.zotero.org/google-docs/?GnGEFM).

In perioperative practice, nasopharyngeal temperature monitoring has demonstrated good correlation with esophageal measurements and allows early detection of UPH when appropriately positioned. However, the invasiveness **and workflow implications** of traditional core monitoring methods may limit their use in low-risk procedures, short cases, or ambulatory surgery, **highlighting the need for proportionate, risk-based monitoring strategies** [(38)](https://www.zotero.org/google-docs/?Bbpy1i).

Recent advances in non-invasive continuous temperature monitoring, including zero-heat-flux (ZHF) technologies, have demonstrated good agreement with esophageal **measurements**, with minimal bias and narrow limits of agreement. These systems allow continuous monitoring without the risks associated with invasive probes and may improve adherence to temperature monitoring standards, particularly in patients undergoing moderate-risk procedures or regional anesthesia [(39)](https://www.zotero.org/google-docs/?aIxIBp) [(36,40,41)](https://www.zotero.org/google-docs/?Gy564O).

Overall, systematic intraoperative temperature monitoring, preferably continuous and using validated core or near-core methods, **should be adapted to clinical and resource context**. **Balancing measurement accuracy with feasibility, safety, and cost supports consistent implementation, reduces practice variability**, and supports temperature-based quality-assurance initiatives.

**RECOMMENDATION # 6**

**Original statement:** *Recommendation 6.* During the intraoperative period, core body temperature should be actively maintained within a target range of 36.0 °C to 37.5 °C (Grade 1B)

**Original rationale:** Maintenance of perioperative normothermia, commonly defined as a core body temperature between 36.0 °C and 37.5 °C, is a central objective of perioperative thermoprotection. Multiple observational studies and randomized trials have demonstrated that intraoperative hypothermia is associated with increased cardiovascular stress, impaired hemostasis, delayed anesthetic drug clearance, postoperative shivering, and prolonged recovery.

Large cohort studies have shown that patients maintained within the normothermic range experience fewer adverse outcomes. In a multicenter cohort including 8,841 patients undergoing joint replacement surgery, intraoperative normothermia was associated with a significantly lower risk of mortality and major cardiovascular complications, including heart failure, ischemic heart disease, and cerebrovascular events, compared with hypothermic patients [(42)](https://www.zotero.org/google-docs/?Nxwyij).

Randomized controlled trials have further demonstrated clinically meaningful benefits of normothermia. In a landmark double-blind trial, patients maintained normothermic during surgery had lower rates of surgical site infection, earlier return of gastrointestinal function, and shorter hospital length of stay compared with hypothermic controls [(18)](https://www.zotero.org/google-docs/?leFPMP). Additional trials have reported a significantly higher incidence of myocardial ischemia, ventricular arrhythmias, and postoperative shivering in hypothermic patients [(43)](https://www.zotero.org/google-docs/?ZyPtGa).

Conversely, recent pragmatic trials comparing aggressive active warming strategies with routine care where minimum recorded temperatures remained in the range of mild hypothermia (35.5-35.9 °C), have not demonstrated significant differences in composite cardiovascular or infectious outcomes [(14)](https://www.zotero.org/google-docs/?yoPinB). These findings highlight that the magnitude, duration, and timing of hypothermia likely influence clinical risk, and that excessive or indiscriminate warming may not confer additional benefit in all patient populations.

Taken together, the available evidence supports maintaining core temperature within the normothermic range throughout the intraoperative period, while emphasizing individualized application of warming strategies based on patient risk, procedure type, and clinical context.

**Verbatim:** For Recommendation 6, one panelist expressed concern that rigid enforcement of a fixed intraoperative temperature range could lead to overtreatment, including unnecessary warming interventions or unintended overheating. The writing group agreed that temperature management should prioritize prevention of clinically relevant hypothermia while allowing for individualized, risk-adapted application.

The recommendation wording was therefore refined to emphasize maintenance of normothermia using a dynamic, patient-centered approach rather than strict range enforcement, without altering the evidence base or GRADE strength. The rationale was aligned to explicitly acknowledge the potential limitations of indiscriminate warming. Re-voting was not required.

**Final version:** *Recommendation 6.* During the intraoperative period, core body temperature should be actively maintained **around the normothermic range, generally ≥36.0 °C, using a risk-adapted approach that avoids both clinically relevant hypothermia and unintended overheating** (Grade 1B).

**Final version of rationale:** Maintenance of perioperative normothermia, commonly defined as a core body temperature between 36.0 °C and 37.5 °C, is a central objective of perioperative thermoprotection. Multiple observational studies and randomized trials have demonstrated that intraoperative hypothermia is associated with increased cardiovascular stress, impaired hemostasis, delayed anesthetic drug clearance, postoperative shivering, and prolonged recovery.

Large cohort studies have shown that patients maintained within the normothermic range experience fewer adverse outcomes. In a multicenter cohort including 8,841 patients undergoing joint replacement surgery, intraoperative normothermia was associated with a significantly lower risk of mortality and major cardiovascular complications, including heart failure, ischemic heart disease, and cerebrovascular events, compared with hypothermic patients [(42)](https://www.zotero.org/google-docs/?Nxwyij).

Randomized controlled trials have further demonstrated clinically meaningful benefits of normothermia. In a landmark double-blind trial, patients maintained normothermic during surgery had lower rates of surgical site infection, earlier return of gastrointestinal function, and shorter hospital length of stay compared with hypothermic controls [(18)](https://www.zotero.org/google-docs/?leFPMP). Additional trials have reported a significantly higher incidence of myocardial ischemia, ventricular arrhythmias, and postoperative shivering in hypothermic patients [(43)](https://www.zotero.org/google-docs/?ZyPtGa).

Conversely, recent pragmatic trials comparing aggressive active warming strategies with routine care where minimum recorded temperatures remained in the range of mild hypothermia (35.5-35.9 °C), have not demonstrated significant differences in composite cardiovascular or infectious outcomes [(14)](https://www.zotero.org/google-docs/?yoPinB). These findings highlight that the magnitude, duration, and timing of hypothermia likely influence clinical risk, and that excessive or indiscriminate warming may not confer additional benefit **and could expose patients to unnecessary intervention** ~~in all patient populations~~.

Taken together, the available evidence supports maintaining core temperature within the normothermic range throughout the intraoperative period, while emphasizing individualized application of warming strategies based on patient risk, procedure type, and clinical context.

**RECOMMENDATION # 7**

**Original statement:** *Recommendation 7.*  Core (or validated near-core) body temperature should be measured in the immediate preoperative period and monitored in a structured manner throughout intraoperative care and post-anesthesia recovery (Grade 1B).

**Original rationale:** Routine perioperative temperature monitoring is a fundamental preventive strategy for the early detection and management of UPH. Measurement of baseline body temperature in the immediate preoperative period allows identification of pre-existing hypothermia, supports risk stratification, and informs timely initiation of prewarming and intraoperative thermoprotection strategies.

Despite longstanding recommendations, adherence to perioperative temperature monitoring remains suboptimal. In alignment with the NICE 2008 guidelines, a recent observational study published in 2023 reported a marked deficit in perioperative temperature documentation: adequate temperature recording was observed in only 2.5% of patients, while approximately 32.7% had no documented temperature measurement at any point during the perioperative period [(26)](https://www.zotero.org/google-docs/?OQo0Hp). These findings underscore a persistent gap between guideline recommendations and routine clinical practice.

Similarly, application of a structured questionnaire (TEMPP) has documented poor adherence to temperature measurement and documentation across multiple regions in Europe and Latin America, highlighting that inadequate thermometry is a widespread and systemic issue rather than an isolated institutional problem [(44)](https://www.zotero.org/google-docs/?hlzF2A). Additional prospective observational data from four hospitals demonstrated missing temperature documentation in more than 30% of anesthetic records, with the greatest deficit occurring during the intraoperative phase. Although inclusion of post-anesthesia care unit (PACU) measurements improved overall documentation rates, substantial gaps in intraoperative monitoring persisted [(45)](https://www.zotero.org/google-docs/?ShAPO0). Extending structured monitoring into the PACU is essential, as a significant proportion of patients arrive hypothermic and may require active rewarming prior to discharge or transfer.

Overall, systematic perioperative thermometry enables early identification of hypothermia, facilitates timely intervention, reduces variability in practice, and provides measurable indicators for audit and feedback within perioperative quality and safety programs.

*Implementation note:* Continuous temperature monitoring is preferred when feasible. However, when continuous methods are unavailable, intermittent measurements at regular intervals (e.g., every 15–30 minutes) represent a pragmatic alternative. Measurement frequency should be adapted to patient risk, procedure duration, anesthetic technique, and clinical context.

**Verbatim:** For Recommendation 7, one panelist noted that core or near-core temperature monitoring may not always be available or feasible in the immediate preoperative setting. The writing group agreed that feasibility varies across institutions and care environments. The recommendation wording was therefore refined to explicitly acknowledge feasibility constraints, while maintaining the emphasis on baseline temperature assessment and structured perioperative monitoring. This clarification did not alter the intent, scope, or GRADE strength of the recommendation, and re-voting was not required.

**Final version:** *Recommendation 7.*  Core (or validated near-core) body temperature should be measured in the immediate preoperative period **when feasible** and monitored in a structured manner throughout intraoperative care and post-anesthesia recovery (Grade 1B).

**Final version of rationale:** Routine perioperative temperature monitoring is a fundamental preventive strategy for the early detection and management of UPH. Measurement of baseline body temperature in the immediate preoperative period allows identification of pre-existing hypothermia, supports risk stratification, and informs timely initiation of prewarming and intraoperative thermoprotection strategies. **When core or near-core measurement is not feasible in the preoperative setting, alternative validated peripheral measurements may provide a pragmatic estimate of baseline thermal status and support early risk identification.**

Despite longstanding recommendations, adherence to perioperative temperature monitoring remains suboptimal. In alignment with the NICE 2008 guidelines, a recent observational study published in 2023 reported a marked deficit in perioperative temperature documentation: adequate temperature recording was observed in only 2.5% of patients, while approximately 32.7% had no documented temperature measurement at any point during the perioperative period [(26)](https://www.zotero.org/google-docs/?OQo0Hp). These findings underscore a persistent gap between guideline recommendations and routine clinical practice.

Similarly, application of a structured questionnaire (TEMPP) has documented poor adherence to temperature measurement and documentation across multiple regions in Europe and Latin America, highlighting that inadequate thermometry is a widespread and systemic issue rather than an isolated institutional problem [(44)](https://www.zotero.org/google-docs/?hlzF2A). Additional prospective observational data from four hospitals demonstrated missing temperature documentation in more than 30% of anesthetic records, with the greatest deficit occurring during the intraoperative phase. Although inclusion of post-anesthesia care unit (PACU) measurements improved overall documentation rates, substantial gaps in intraoperative monitoring persisted [(45)](https://www.zotero.org/google-docs/?ShAPO0). Extending structured monitoring into the PACU is essential, as a significant proportion of patients arrive hypothermic and may require active rewarming prior to discharge or transfer.

Overall, systematic perioperative thermometry enables early identification of hypothermia, facilitates timely intervention, reduces variability in practice, and provides measurable indicators for audit and feedback within perioperative quality and safety programs.

*Implementation note:* Continuous temperature monitoring is preferred when feasible. However, when continuous methods are unavailable, intermittent measurements at regular intervals (e.g., every 15–30 minutes) represent a pragmatic alternative. Measurement frequency should be adapted to patient risk, procedure duration, anesthetic technique, and **the feasibility of available monitoring devices at each perioperative phase**.

**RECOMMENDATION #8**

**Original statement:** *Recommendation 8.* Active prewarming should be performed prior to anesthesia induction to reduce the risk of intraoperative and postoperative hypothermia. When feasible, prewarming for 30–60 minutes is recommended, with shorter durations considered when workflow or clinical context limits longer prewarming (Grade 1A).

**Original rationale:** Active preoperative warming is a highly effective strategy for preventing unintentional perioperative hypothermia (UPH), primarily by attenuating early redistribution of heat from the core to the peripheral compartment following anesthesia induction. Consistent evidence from randomized trials and systematic reviews demonstrates that prewarming reduces both intraoperative and postoperative hypothermia.

A 2024 systematic review including 27 studies **(**n = 1,795) showed that prewarming durations of 10–30 minutes significantly reduced intraoperative (Hedges’ g = 0.972; p < 0.001; n = 3,035) and postoperative hypothermia (Hedges’ g = 0.818; p < 0.001) [(46)](https://www.zotero.org/google-docs/?GCmcAP). Earlier systematic reviews similarly identified approximately 30 minutes as an optimal duration, while noting that even shorter periods (≥10 minutes) may confer benefit. Across studies, forced-air warming was the most consistently effective modality [(47)](https://www.zotero.org/google-docs/?T8pE1h).

Randomized clinical trials have shown that prewarming improves end-of-surgery core temperature, reduces postoperative shivering, and enhances thermal comfort [(48)](https://www.zotero.org/google-docs/?sO3BiU). Benefits have been reported in both general and neuraxial anesthesia, including in patients undergoing major orthopedic and abdominal surgery [(49)](https://www.zotero.org/google-docs/?n4NY99) [(50)](https://www.zotero.org/google-docs/?n1j2lM). Large observational data, including analyses supporting the AWMF S3 guidelines, demonstrate substantially lower rates of intraoperative and postoperative hypothermia in patients receiving prewarming, with absence of prewarming identified as a significant risk factor for hypothermia [(51)](https://www.zotero.org/google-docs/?3hOJ4R).

However, the effectiveness of prewarming may be attenuated in short-duration procedures and selected regional anesthesia settings, as demonstrated in randomized trials of hand surgery under peripheral nerve block [(53)](https://www.zotero.org/google-docs/?88kPUq). These findings highlight the importance of tailoring prewarming strategies to patient risk, anesthetic technique, and procedural characteristics.

*Implementation note:* Forced-air warming and resistive conductive heating devices are the most extensively studied prewarming modalities. When feasible, prewarming should be initiated in the preoperative holding area and integrated into routine perioperative workflows.

**Verbatim:** For Recommendation 8, one panelist who partially agreed noted that, although strong evidence supports the effectiveness of active prewarming in reducing intraoperative and postoperative hypothermia, routine universal implementation may be limited by practical considerations, including workflow disruption, availability of warming equipment, staffing constraints, and preoperative holding area logistics. The panelist also highlighted that the magnitude of benefit may be attenuated in short-duration procedures and selected regional anesthesia settings.

The writing group agreed that, while the evidence base remains robust, feasibility and impact may vary across patients, procedures, and care environments. The recommendation wording was therefore refined to emphasize a targeted, risk-adapted approach, prioritizing patients at moderate to high risk of hypothermia, while acknowledging that shorter prewarming durations (≥10 minutes) may still provide meaningful benefit when longer prewarming is not feasible. This clarification did not alter the intent, scope, or GRADE strength of the recommendation, and re-voting was not required.

**Final version:** Recommendation 8. Active prewarming should be performed prior to anesthesia induction to reduce the risk of intraoperative and postoperative hypothermia, particularly in patients at moderate to high risk. When feasible, prewarming for 30–60 minutes is recommended, with shorter durations (≥10 minutes) considered when workflow, logistics, or clinical context limits longer prewarming (Grade 1A).

**Final version of rationale:** Active preoperative warming is a highly effective strategy for preventing unintentional perioperative hypothermia (UPH), primarily by attenuating early redistribution of heat from the core to the peripheral compartment following anesthesia induction. Consistent evidence from randomized trials and systematic reviews demonstrates that prewarming reduces both intraoperative and postoperative hypothermia.

A 2024 systematic review including 27 studies **(**n = 1,795) showed that prewarming durations of 10–30 minutes significantly reduced intraoperative (Hedges’ g = 0.972; p < 0.001; n = 3,035) and postoperative hypothermia (Hedges’ g = 0.818; p < 0.001) [(46)](https://www.zotero.org/google-docs/?GCmcAP). Earlier systematic reviews similarly identified approximately 30 minutes as an optimal duration, while noting that even shorter periods (≥10 minutes) may confer benefit. Across studies, forced-air warming was the most consistently effective modality [(47)](https://www.zotero.org/google-docs/?T8pE1h).

Randomized clinical trials have shown that prewarming improves end-of-surgery core temperature, reduces postoperative shivering, and enhances thermal comfort [(48)](https://www.zotero.org/google-docs/?sO3BiU). Benefits have been reported in both general and neuraxial anesthesia, including in patients undergoing major orthopedic and abdominal surgery [(49)](https://www.zotero.org/google-docs/?n4NY99) [(50)](https://www.zotero.org/google-docs/?n1j2lM). Large observational data, including analyses supporting the AWMF S3 guidelines, demonstrate substantially lower rates of intraoperative and postoperative hypothermia in patients receiving prewarming, with absence of prewarming identified as a significant risk factor for hypothermia [(51)](https://www.zotero.org/google-docs/?3hOJ4R).

**Although the evidence supporting active prewarming is strong, routine universal implementation may be constrained by logistical factors such as workflow impact, equipment availability, and staffing** [(53)](https://www.zotero.org/google-docs/?88kPUq). These findings highlight the importance of tailoring prewarming strategies **in a targeted, risk-adapted manner, prioritizing patients at moderate to high risk of hypothermia, while recognizing that even shorter prewarming durations can provide meaningful benefit when longer periods are not feasible**.

*Implementation note:* Forced-air warming and resistive conductive heating devices are the most extensively studied prewarming modalities. When feasible, prewarming should be initiated in the preoperative holding area and integrated into routine perioperative workflows, **with prioritization of higher-risk patients when resources are limited**.

**RECOMMENDATION # 9**

**Original statement:** *Recommendation 9.*  When active warming devices are available, their use should be integrated into perioperative care following manufacturers’ instructions to ensure effective thermoprotection and minimize adverse events (Grade 2B).

**Original rationale:** Active warming devices are widely used in perioperative care and are generally safe when applied correctly. However, inappropriate use may result in preventable thermal injury. Reported adverse events are uncommon and typically involve superficial skin burns, most often associated with obstruction of airflow, excessive localized pressure, prolonged exposure, or deviation from manufacturer-recommended application conditions. Isolated case reports have described minor thermal injuries related to mechanical obstruction or improper positioning of forced air warming systems, underscoring the importance of correct device use and intraoperative vigilance [(54)](https://www.zotero.org/google-docs/?9eO6rN).

Evidence from randomized controlled trials and observational studies indicates that the overall incidence of clinically significant complications related to active warming devices is low. In the multicenter randomized BARRIER trial evaluating prolonged use of self-warming blankets in elective surgical patients, no serious device-related adverse events were observed. Mild, transient skin changes occurred in a small proportion of patients and resolved spontaneously, supporting the favorable safety profile of these devices when used as intended [(55)](https://www.zotero.org/google-docs/?R3qiqZ).

Given the increasing reliance on active warming strategies across diverse surgical settings, adherence to manufacturer instructions, regular staff training, and routine inspection of warming systems are essential to optimize patient safety. Standardized use protocols and careful attention to intraoperative positioning reduce the risk of device malfunction and patient injury while preserving the established clinical benefits of perioperative thermoprotection.

**Verbatim**: For Recommendation 9, one panelist suggested explicitly incorporating institutional protocols into the recommendation to reinforce the systems-based nature of safe active warming device use. The writing group agreed that effective and safe thermoprotection depends not only on adherence to manufacturer instructions but also on standardized local processes, staff training, and device oversight. The recommendation wording was therefore refined accordingly, without altering its scope, intent, or GRADE classification. Re-voting was not required.

**Final version:** *Recommendation 9.*  When active warming devices are available, their use should be integrated into perioperative care following manufacturers’ instructions **and institutional protocols,** to ensure effective thermoprotection and minimize adverse events (Grade 2B).

**Final version of rationale:** Active warming devices are widely used in perioperative care and are generally safe when applied correctly. However, inappropriate use may result in preventable thermal injury. Reported adverse events are uncommon and typically involve superficial skin burns, most often associated with obstruction of airflow, excessive localized pressure, prolonged exposure, or deviation from manufacturer-recommended application conditions. Isolated case reports have described minor thermal injuries related to mechanical obstruction or improper positioning of forced air warming systems, underscoring the importance of correct device use and intraoperative vigilance [(54)](https://www.zotero.org/google-docs/?9eO6rN).

Evidence from randomized controlled trials and observational studies indicates that the overall incidence of clinically significant complications related to active warming devices is low. In the multicenter randomized BARRIER trial evaluating prolonged use of self-warming blankets in elective surgical patients, no serious device-related adverse events were observed. Mild, transient skin changes occurred in a small proportion of patients and resolved spontaneously, supporting the favorable safety profile of these devices when used as intended [(55)](https://www.zotero.org/google-docs/?R3qiqZ).

Given the increasing reliance on active warming strategies across diverse surgical settings, adherence to manufacturer instructions **together** **with standardized institutional protocols**, regular staff training, and routine inspection of warming systems are essential to optimize patient safety. Standardized use protocols and careful attention to intraoperative positioning reduce the risk of device malfunction and patient injury while preserving the established clinical benefits of perioperative thermoprotection.

**RECOMMENDATION # 10 & 11**

**Original statements:** *Recommendation 10.* Warmed intravenous fluids should be used as an adjunct, rather than a standalone strategy, for the prevention of inadvertent perioperative hypothermia and the maintenance of perioperative normothermia (Grade 1B).

*Recommendation 11.* When intravenous fluids are administered intraoperatively, they should be actively warmed, particularly during procedures involving large-volume infusions or prolonged operative duration and used in combination with other active warming modalities (Grade 1A).

**Original rationale:** Administration of room-temperature intravenous fluids represents a relevant source of heat loss during the perioperative period, particularly during prolonged procedures or when large fluid volumes are infused. Experimental studies and clinical trials have shown that fluid warming, when used as a standalone intervention, is insufficient to prevent inadvertent perioperative hypothermia. In a comparative study in adult surgical patients, more than 70% developed postoperative hypothermia despite isolated use of warmed fluids, with no significant differences in final core temperature compared with controls. This finding highlights the predominant influence of other thermal determinants, including baseline patient temperature, active warming, and operating room ambient temperature [(56)](https://www.zotero.org/google-docs/?eu4wyz).

Nevertheless, multiple randomized controlled trials in selected populations (particularly women undergoing elective cesarean delivery under neuraxial anesthesia) have demonstrated that administration of warmed intravenous fluids is associated with significantly higher end-of-procedure core temperatures and reduced subjective cold sensation compared with room-temperature infusions [(57](https://www.zotero.org/google-docs/?ooPHsV), [58)](https://www.zotero.org/google-docs/?ALW19n). These findings suggest that fluid warming contributes to maintenance of normothermia and improves thermal comfort, even though its isolated impact on major clinical outcomes appears limited.

Consistently, systematic reviews, including a Cochrane review, report that warming intravenous fluids maintains core body temperature approximately 0.5 °C higher than administration of fluids at ambient temperature and reduces postoperative shivering. However, available evidence suggests that while fluid warming contributes to intraoperative thermal control, its effect on reducing major postoperative complications is modest when not incorporated into a multimodal thermoprotection strategy [(59)](https://www.zotero.org/google-docs/?aAbMLM).

From a physiological perspective, thermodynamic modeling indicates that infusion of fluids warmed to approximately 40–45 °C minimizes net heat loss associated with intravenous administration. Randomized trials in ambulatory gynecologic surgery have confirmed that fluids warmed to around 42 °C are associated with significantly higher core temperatures and a lower incidence of postoperative shivering compared with non-warmed fluids [(60,61)](https://www.zotero.org/google-docs/?2Yq2Lv).

Overall, the evidence supports the use of warmed intravenous fluids as an adjunctive measure, particularly when large-volume infusions or prolonged procedures are anticipated and emphasizes the importance of combining fluid warming with other active thermoprotection strategies to effectively prevent inadvertent perioperative hypothermia.

**Verbatim:** Recommendation 10 achieved high agreement, and no substantive comments were received from panelists who partially agreed. No modifications were made. Re-voting is not considered necessary. For Recommendation 11, one panelist suggested that the wording could overstate the independent effect of fluid warming and proposed either downgrading the GRADE or softening the language. The writing group agreed that intravenous fluid warming provides modest but consistent benefit and is insufficient as a standalone intervention. The recommendation wording was therefore refined to soften the imperative tone while preserving the emphasis on multimodal application. Given the strength and consistency of the supporting evidence, the GRADE classification was retained. Re-voting was not required.

**Final version:** *Recommendation 10.* Warmed intravenous fluids should be used as an adjunct, rather than a standalone strategy, for the prevention of inadvertent perioperative hypothermia and the maintenance of perioperative normothermia (Grade 1B).

*Recommendation 11.* When intravenous fluids are administered intraoperatively, **active warming of fluids** **should be routinely considered**, particularly during procedures involving large-volume infusions or prolonged operative duration and used in combination with other active warming modalities (Grade 1A).

**Final version of rationale:** Administration of room-temperature intravenous fluids represents a relevant source of heat loss during the perioperative period, particularly during prolonged procedures or when large fluid volumes are infused. Experimental studies and clinical trials have shown that fluid warming, when used as a standalone intervention, is insufficient to prevent inadvertent perioperative hypothermia. In a comparative study in adult surgical patients, more than 70% developed postoperative hypothermia despite isolated use of warmed fluids, with no significant differences in final core temperature compared with controls. This finding highlights the predominant influence of other thermal determinants, including baseline patient temperature, active warming, and operating room ambient temperature [(56)](https://www.zotero.org/google-docs/?eu4wyz).

Nevertheless, multiple randomized controlled trials in selected populations (particularly women undergoing elective cesarean delivery under neuraxial anesthesia) have demonstrated that administration of warmed intravenous fluids is associated with significantly higher end-of-procedure core temperatures and reduced subjective cold sensation compared with room-temperature infusions [(57](https://www.zotero.org/google-docs/?ooPHsV), [58)](https://www.zotero.org/google-docs/?ALW19n). These findings suggest that fluid warming contributes to maintenance of normothermia and improves thermal comfort, even though its isolated impact on major clinical outcomes appears limited.

Consistently, systematic reviews, including a Cochrane review, report that warming intravenous fluids maintains core body temperature approximately 0.5 °C higher than administration of fluids at ambient temperature and reduces postoperative shivering. **While the independent effect of fluid warming is modest and insufficient as a standalone intervention, its consistent ability to reduce heat loss during large-volume infusions supports its routine use as part of a multimodal perioperative thermoprotection strategy** [(59)](https://www.zotero.org/google-docs/?aAbMLM).

From a physiological perspective, thermodynamic modeling indicates that infusion of fluids warmed to approximately 40–45 °C minimizes net heat loss associated with intravenous administration. Randomized trials in ambulatory gynecologic surgery have confirmed that fluids warmed to around 42 °C are associated with significantly higher core temperatures and a lower incidence of postoperative shivering compared with non-warmed fluids [(60,61)](https://www.zotero.org/google-docs/?2Yq2Lv).

Overall, the evidence supports the use of warmed intravenous fluids as an adjunctive measure, particularly when large-volume infusions or prolonged procedures are anticipated and emphasizes the importance of combining fluid warming with other active thermoprotection strategies to effectively prevent inadvertent perioperative hypothermia.

**RECOMMENDATION # 12**

**Original statement:** *Recommendation 12*. Selection of perioperative active warming strategies should be based on patient characteristics, procedural requirements, and local resource availability, prioritizing modalities with demonstrated efficacy and safety within the specific clinical context (Grade 1B).

**Original rationale:** A wide range of perioperative warming strategies is available and can be broadly categorized into passive insulation and active warming modalities. Passive measures (e.g. cotton or reflective-insulating blankets) alone provide limited protection against perioperative heat loss, whereas the strongest evidence supports the use of active warming strategies for effective prevention of inadvertent perioperative hypothermia.

Active warming modalities include forced-air warming, circulating-water systems, resistive polymer heating, and thermal mattresses. Meta-analyses and randomized controlled trials consistently demonstrate that forced-air warming is more effective than passive insulation and, in some settings, superior to circulating-water mattresses in preventing perioperative hypothermia [(62](https://www.zotero.org/google-docs/?GV87Ub), [63)](https://www.zotero.org/google-docs/?xPbxgo). However, comparative studies across different surgical populations generally show similar efficacy between forced-air warming and resistive polymer systems with respect to maintenance of core body temperature, suggesting that multiple active modalities can be effective when appropriately applied

In orthopedic and abdominal surgery, randomized trials comparing forced-air warming with resistive polymer or circulating-water systems have not demonstrated clinically meaningful differences in intraoperative core temperature [(64)](https://www.zotero.org/google-docs/?iUFGnh). Some studies report reductions in postoperative shivering with forced-air warming, while others show comparable thermal outcomes between devices [(65](https://www.zotero.org/google-docs/?XH7xNC), [66)](https://www.zotero.org/google-docs/?g4fxU9). Recent retrospective cohort data in major joint arthroplasty indicate a higher incidence of perioperative hypothermia and longer post-anesthesia care unit stay associated with thermal mattresses compared with forced-air warming, although these findings appear context-specific and do not support universal device superiority [(67)](https://www.zotero.org/google-docs/?WeFNUD).

Systematic reviews and network meta-analyses further confirm that active warming strategies applied to different body regions are consistently more effective than passive insulation in maintaining core temperature and reducing postoperative shivering [(68)](https://www.zotero.org/google-docs/?7pzjuj). In contrast, reflective or insulating blankets alone have not demonstrated clear benefits over standard care, whereas active forced-air warming remains associated with more reliable preservation of normothermia at 60 and 120 minutes after induction of anesthesia [(69)](https://www.zotero.org/google-docs/?DPy2Vt).

Taken together, the available evidence indicates that no single warming modality is optimal for all patients or procedures. Effective perioperative thermoprotection depends on selecting warming strategies tailored to patient risk profile, type and duration of surgery, extent of surgical exposure, infection-control considerations, staff familiarity, and local resource availability. Prioritizing active warming strategies with demonstrated efficacy and safety, and adapting their use to the specific clinical context, supports effective, safe, and sustainable prevention of inadvertent perioperative hypothermia across diverse healthcare settings.

**Verbatim:** Recommendation 12 achieved unanimous agreement among panelists, and no modifications were required.

**RECOMMENDATION # 13**

**Original statement:** *Recommendation 13.* Multimodal warming strategies combining active and passive measures should be used to prevent inadvertent perioperative hypothermia and its associated complications, particularly in patients at increased risk or undergoing prolonged or high-exposure procedures (Grade 1B).

**Original rationale:** Evidence from randomized controlled trials and meta-analyses indicates that combining multiple warming interventions is more effective than single-modality approaches for maintaining perioperative normothermia. Multimodal strategies, typically integrating prewarming, intraoperative active surface warming, and adjunctive measures such as warmed intravenous fluids, address complementary pathways of heat loss and provide more reliable thermal control.

In a double-blind randomized trial involving 200 surgical patients, the combination of forced-air warming and warmed intravenous fluids maintained normothermia, whereas patients managed without active warming developed core temperatures approximately 2 °C lower. This degree of hypothermia was associated with higher rates of surgical site infection and prolonged hospital stay, underscoring the clinical relevance of combined warming strategies [(18)](https://www.zotero.org/google-docs/?R9abAt).

Meta-analytic data further support these findings. A meta-analysis including seven randomized controlled trials (1,086 patients) demonstrated that multimodal warming approaches were associated with an approximate 48% reduction in surgical site infection compared with single prewarming strategies, whereas forced-air warming used alone was associated with a smaller and less consistent effect [(70)](https://www.zotero.org/google-docs/?EtouiU). These results suggest that the clinical benefits of thermoprotection are maximized when interventions are combined rather than applied in isolation.

In the context of neuraxial anesthesia, randomized trials indicate that active warming strategies reduce postoperative shivering and improve thermal comfort compared with passive insulation alone, even when differences in final core temperature are modest. This suggests that multimodal thermal management may offer clinically relevant benefits beyond strict maintenance of normothermia, particularly in patient comfort and early recovery [(71,72)](https://www.zotero.org/google-docs/?49lvkS).

Overall, the evidence supports the use of multimodal thermoprotection strategies to reduce hypothermia-related adverse outcomes and improve perioperative recovery. While the magnitude of benefit may vary across procedures and patient populations, combining complementary warming interventions provides more consistent thermal control than single-modality approaches and represents best practice in routine perioperative care.

**Verbatim:** Recommendation 13 achieved unanimous agreement among panelists, and no modifications were required

**RECOMMENDATION # 14**

**Original statement:** *Recommendation 14.* Postoperative body temperature should be routinely measured and documented in all patients during post-anesthesia care to enable early detection and management of inadvertent perioperative hypothermia (Grade 1B).

**Original rationale:** The incidence of UPH on admission to the post-anesthesia care unit (PACU) remains substantial, ranging between approximately 25% and 50% across published studies. Postoperative hypothermia is consistently associated with an increased risk of adverse outcomes, including surgical site infection, bleeding and transfusion requirements, cardiac events, prolonged PACU stay, and extended hospitalization [(73)](https://www.zotero.org/google-docs/?bALyyK).

Coordinated monitoring of core body temperature during the postoperative period is therefore a fundamental component of perioperative thermoprotection. Multiple clinical practice guidelines recommend routine temperature assessment in the PACU, beginning at admission and continuing at regular intervals. Measurement on arrival, followed by reassessment at intervals of approximately 30 minutes, allows timely identification of residual or recurrent hypothermia and supports appropriate escalation of warming interventions. A core temperature of at least 36.0 °C is generally recommended before discharge from the PACU or transfer to the ward [(74)](https://www.zotero.org/google-docs/?yMIpKF).

Systematic postoperative temperature monitoring is particularly important in patients at increased risk of hypothermia, including those with higher ASA physical status (ASA > II), undergoing intermediate or major surgery, presenting with preoperative hypothermia, receiving combined regional and general anesthesia, having significant cardiovascular comorbidity, or at the extremes of age (29). Incorporating postoperative thermometry into routine PACU workflows reduces variability in practice and reinforces thermoprotection as a continuous perioperative responsibility [(29)](https://www.zotero.org/google-docs/?1mXe87).

**Verbatim:** Recommendation 14 achieved unanimous agreement among panelists, and no modifications were required

**RECOMMENDATION # 15**

**Original statement:**

**Original rationale:** **Rationale**

Once inadvertent perioperative hypothermia is identified in the postoperative period, prompt active rewarming is required to minimize physiological stress and reduce the risk of associated complications. Delayed correction of hypothermia is associated with persistent shivering, increased oxygen consumption, patient discomfort, and prolonged recovery [(75,76)](https://www.zotero.org/google-docs/?p5DtUv).

Randomized trials and systematic reviews evaluating postoperative management of hypothermia in adults undergoing surgery under general or neuraxial anesthesia consistently identify active warming as a central component of effective treatment. Among active modalities, forced-air warming has been shown to achieve normothermia more rapidly than passive insulation and is associated with clinically meaningful reductions in the time required to restore normal body temperature in patients with postoperative hypothermia. Conductive warming systems have also demonstrated efficacy and are recommended as acceptable alternatives in selected settings [(74,76,77)](https://www.zotero.org/google-docs/?uMWpTi).

Clinical practice guidelines consistently recommend initiating active rewarming when patients present with a core body temperature below 36.0 °C on admission to the post-anesthesia care unit or intensive care unit. Rewarming should be continued until normothermia is achieved or the patient reports adequate thermal comfort, recognizing that both physiological stabilization and patient experience are relevant therapeutic goals [(29,74)](https://www.zotero.org/google-docs/?Lwq0O0).

Incorporating standardized active rewarming protocols into postoperative care pathways ensures timely correction of hypothermia, reduces variability in practice, and complements routine postoperative temperature monitoring. This approach is particularly important in patients at increased risk of persistent hypothermia, including those undergoing major or prolonged surgery or receiving neuraxial or combined anesthetic techniques.

**Verbatim:** For Recommendation 15, two panelists who partially agreed suggested avoiding rigid language by removing “for all patients” and clarifying the rewarming endpoint to better reflect variability in clinical context. The writing group agreed that postoperative rewarming should remain patient-centered and adaptable. The recommendation wording was therefore refined to emphasize initiation of rewarming below 36.0 °C and continuation until normothermia and/or thermal comfort is achieved, without altering the scope, intent, or GRADE classification. Re-voting was not required.

**Final version:** *Recommendation 15.* Active rewarming should be initiated in the post-anesthesia care unit or intensive care unit for ~~al~~l patients with a core body temperature below 36.0 °C and **generally** continued until **core temperature is ≥36.0 °C and/**or thermal comfort is achieved (Grade 1B).

**Final version of rationale**: The writing panel agreed that no modifications to the rationale were required.

**RECOMMENDATION # 16**

**Original statement**: "Recommendation 16. Assessment of thermal comfort should be incorporated as a routine component of perioperative patient-experience and quality-of-care evaluation (Grade 1C).

**Original rationale:** Rationale

Patient experience has been defined as “the sum of all interactions, shaped by an organization’s culture, that influence patient perceptions across the continuum of care.” According to the National Health Service (NHS), patient experience constitutes one of the three core domains of healthcare quality, alongside patient safety and clinical effectiveness (78). Patient-reported experience measures (PREMs) are validated instruments used to capture patients’ perceptions of care, including comfort, satisfaction, and overall well-being, and provide complementary information to traditional clinical outcomes (79).

Thermal comfort, defined as the individual perception of physical comfort without distress from feeling too cold or too warm, represents a relevant and patient-centred outcome of perioperative care. Postoperative hypothermia is associated with unpleasant cold sensation, patient dissatisfaction, and is frequently recalled as one of the most negative aspects of the perioperative experience. Cold discomfort may also trigger postoperative shivering, which is consistently reported alongside pain, nausea, and vomiting as one of the most common and distressing complaints in the post-anesthesia care unit (PACU) (80,81).

Temperature management is therefore an integral component of patient well-being during the perioperative period. Clinical studies demonstrate that maintenance of perioperative normothermia improves patient-reported thermal comfort, reduces the incidence and severity of postoperative shivering, decreases perioperative anxiety, and enhances overall satisfaction with care compared with passive warming strategies alone. Importantly, patient discomfort related to cold exposure may persist even when core temperature has returned to acceptable ranges, underscoring the value of assessing perceived comfort in addition to objective temperature measurements (80,81).

Routine evaluation of thermal comfort during postoperative care allows early identification of residual cold discomfort and supports timely adjustment of warming interventions. Integrating thermal comfort into PREMs and quality-assurance frameworks reinforces thermoprotection as both a patient-safety priority and a determinant of patient-centred perioperative care, complementing physiological targets and strengthening the overall quality of perioperative services.

**Verbatim:** For Recommendation 16, one panelist suggested clarifying that thermal comfort assessment should rely on simple patient-reported measures when feasible, taking into account patient consciousness and cognitive status. The writing group agreed that this clarification improves feasibility and aligns with patient-experience measurement principles. The recommendation wording was therefore refined accordingly, without altering its scope, intent, or GRADE classification. Re-voting was not required.

**Final version:** *Recommendation 16.* Assessment of thermal comfort should be incorporated as a routine component of perioperative patient-experience and quality-of-care evaluation, **using simple patient-reported measures where feasible** (Grade 1C).

**Final version of rationale:** Patient experience has been defined as “*the sum of all interactions, shaped by an organization’s culture, that influence patient perceptions across the continuum of care*.” According to the National Health Service (NHS), patient experience constitutes one of the three core domains of healthcare quality, alongside patient safety and clinical effectiveness [(78)](https://www.zotero.org/google-docs/?gQSNem). Patient-reported experience measures (PREMs) are validated instruments used to capture patients’ perceptions of care, including comfort, satisfaction, and overall well-being, and provide complementary information to traditional clinical outcomes [(79)](https://www.zotero.org/google-docs/?g1nQxp).

Thermal comfort, defined as the individual perception of physical comfort without distress from feeling too cold or too warm, represents a relevant and patient-centred outcome of perioperative care. Postoperative hypothermia is associated with unpleasant cold sensation, patient dissatisfaction, and is frequently recalled as one of the most negative aspects of the perioperative experience. Cold discomfort may also trigger postoperative shivering, which is consistently reported alongside pain, nausea, and vomiting as one of the most common and distressing complaints in the post-anesthesia care unit (PACU) [(80,81)](https://www.zotero.org/google-docs/?To2QQD).

Temperature management is therefore an integral component of patient well-being during the perioperative period. Clinical studies demonstrate that maintenance of perioperative normothermia improves patient-reported thermal comfort, reduces the incidence and severity of postoperative shivering, decreases perioperative anxiety, and enhances overall satisfaction with care compared with passive warming strategies alone. Importantly, patient discomfort related to cold exposure may persist even when core temperature has returned to acceptable ranges, underscoring the value of assessing perceived comfort in addition to objective temperature measurements [(80,81)](https://www.zotero.org/google-docs/?G5sh0w).

Routine evaluation of thermal comfort during postoperative care allows early identification of residual cold discomfort and supports timely adjustment of warming interventions. **Integrating assessment of perceived** ~~thermal~~ comfort **using simple patient-reported measurements** into PREMs and quality-assurance frameworks reinforces thermoprotection as both a patient-safety priority and a determinant of patient-centred perioperative care, complementing physiological targets and strengthening the overall quality of perioperative services.

**Supplementary Material 3**

**Summary of consensus recommendations, level of agreement, and post-feedback modifications**

| **Recommendation** | **Topic** | **GRADE** | **Level of agreement** | **Modification after feedback** | **Description of modification** |
| --- | --- | --- | --- | --- | --- |
| Recommendation 1 | Institutional thermoprotection policies | 1B | 10/11 complete; 1 partial | Yes | Minor wording refinement to emphasize sustainability, maintenance, and system accountability |
| Recommendation 2 | Integration into ERAS and PBM programs | 1B | 11/11 complete | No | No modification required |
| Recommendation 3 | Operating room ambient temperature management | 1C | 9/11 complete; 2 partial | Yes | Clarified exposure-focused management, flexibility of targets, and feasibility constraints related to infrastructure |
| Recommendation 4 | Identification of patients at increased risk of hypothermia | 1C | 9/11 complete; 2 partial | Yes | Explicit linkage between risk identification and targeted monitoring and thermoprotection strategies |
| Recommendation 5 | Intraoperative temperature monitoring | 1C | 9/11 complete; 2 partial | Yes | Emphasized proportional, risk-adapted monitoring and the role of validated non-invasive continuous technologies |
| Recommendation 6 | Intraoperative normothermia targets | 1B | 8/12 complete; 3 partial; 1 neutral | Yes | Reduced rigid range enforcement and emphasized individualized, risk-adapted temperature management |
| Recommendation 7 | Perioperative temperature monitoring continuity | 1B | 9/11 complete; 2 partial | Yes | Added feasibility qualifier for preoperative core or near-core temperature measurement |
| Recommendation 8 | Active prewarming strategies | 1A | 7/11 complete; 4 partial | Yes | Emphasized targeted, risk-based prioritization and acknowledged logistical constraints |
| Recommendation 9 | Safe use of active warming devices | 2B | 10/11 complete; 1 partial | Yes | Added explicit reference to institutional protocols alongside manufacturer instructions |
| Recommendation 10 | Warmed intravenous fluids as adjunct therapy | 1B | 9/11 complete; 2 partial | No | No modification required |
| Recommendation 11 | Active warming of intravenous fluids | 1A | 9/11 complete; 2 partial | Yes | Softened imperative tone while retaining emphasis on multimodal thermoprotection |
| Recommendation 12 | As described in the manuscript | — | 11/11 complete | No | No modification required |
| Recommendation 13 | As described in the manuscript | — | 11/11 complete | No | No modification required |
| Recommendation 14 | As described in the manuscript | — | 11/11 complete | No | No modification required |
| Recommendation 15 | Postoperative active rewarming | 1B | 8/10 complete; 2 partial | Yes | Removed blanket language and clarified rewarming endpoints |
| Recommendation 16 | Assessment of thermal comfort | 1C | 9/11 complete; 2 partial | Yes | Emphasized use of simple patient-reported measures where feasible |

*Modifications were limited to wording refinements intended to improve clarity, feasibility, and alignment with implementation contexts. No recommendation required re-grading or re-voting following panel feedback.*
