# Supplementary material for: Thermoprotection in the perioperative period: an international consensus statement for the maintenance of normothermia
Source: Research Square preprint supplement (doi:10.21203/rs.3.rs-8688093/v1), 2026-02-04
Supplement: Supplementary file 2 [file 70cb3ba6ae39ad8f38679cf5.xlsx]

## Sheet: Respuestas de formulario 1
Marca temporal	Participant Name	Recommendation 1 Institutions should establish formal standards and policies for the prevention of unintentional perioperative hypothermia as an integral component of perioperative patient-safety programs (Grade 1B). Rationale Unintentional perioperative hypothermia (UPH) is a frequent condition in institutions lacking formal prevention policies, with reported incidences of up to 70%. Its associa…	Comments Recom 1 (Only if "partially" or "completely disagree")	Recommendation 2. Institutions should incorporate structured perioperative thermoprotection strategies into enhanced recovery pathways and patient blood management programs (Grade 1B). Rationale Institutional policies aimed at maintaining perioperative normothermia have been shown to significantly influence healthcare utilization and costs. Economic analyses estimate that perioperative hypothermi…	Comments Recom 2 (Only if "partially" or "completely disagree")	Recommendation 3. Within perioperative quality-assurance programs, institutions should ensure active control of operating room ambient temperature, targeting a minimum of 21–23 °C for adult patients and ≥24 °C for pediatric patients during periods of patient exposure, with appropriate adjustments based on patient population, procedure, and clinical context (Grade 1C). Rationale Ambient operating …	Comments Recom 3 (Only if "partially" or "completely disagree")	Recommendation 4. Institutions should establish standardized criteria to identify patients at increased risk of unintentional perioperative hypothermia (Grade 1C). Rationale Identification of patients at increased risk of UPH is a critical prerequisite for targeted prevention strategies. A systematic review and meta-analysis including over 15,000 patients identified several independent risk facto…	Comments Recom 4 (Only if "partially" or "completely disagree")	Recommendation 5. Intraoperative body temperature should be monitored using validated core temperature measurement methods whenever feasible. Non-invasive continuous technologies based on transcutaneous thermal gradients may be used as complementary alternatives when invasive monitoring is not indicated or feasible (Grade 1C). Rationale Accurate measurement of core body temperature is fundamental…	Comments Recom 5 (Only if "partially" or "completely disagree")	Recommendation 6. During the intraoperative period, core body temperature should be actively maintained within a target range of 36.0 °C to 37.5 °C (Grade 1B). Rationale Maintenance of perioperative normothermia, commonly defined as a core body temperature between 36.0 °C and 37.5 °C, is a central objective of perioperative thermoprotection. Multiple observational studies and randomized trials ha…	Comments Recom 6 (Only if "partially" or "completely disagree")	Recommendation 7. Core (or validated near-core) body temperature should be measured in the immediate preoperative period and monitored in a structured manner throughout intraoperative care and post-anesthesia recovery (Grade 1B). Rationale Routine perioperative temperature monitoring is a fundamental preventive strategy for the early detection and management of UPH. Measurement of baseline body t…	Comments Recom 7 (Only if "partially" or "completely disagree")	Active prewarming Recommendation 8. Active prewarming should be performed prior to anesthesia induction to reduce the risk of intraoperative and postoperative hypothermia. When feasible, prewarming for 30–60 minutes is recommended, with shorter durations considered when workflow or clinical context limits longer prewarming (Grade 1A). Rationale Active preoperative warming is a highly effective st…	Comments Recom 8 (Only if "partially" or "completely disagree")	If you want to search any reference, please enter to this link: https://docs.google.com/document/d/1i4eL2_fibPtAEoE2Umw9I_ZBbXEYSYEeLQxoul5s0jg/edit?usp=sharing	Recommendation 9. When active warming devices are available, their use should be integrated into perioperative care following manufacturers’ instructions to ensure effective thermoprotection and minimize adverse events (Grade 2B). Rationale Active warming devices are widely used in perioperative care and are generally safe when applied correctly. However, inappropriate use may result in preventab…	Comments Recom 9 (Only if "partially" or "completely disagree")	Recommendation 10. Warmed intravenous fluids should be used as an adjunct, rather than a standalone strategy, for the prevention of inadvertent perioperative hypothermia and the maintenance of perioperative normothermia (Grade 1B). Administration of room-temperature intravenous fluids represents a relevant source of heat loss during the perioperative period, particularly during prolonged procedur…	Comments Recom 10 (Only if "partially" or "completely disagree")	Recommendation 11. When intravenous fluids are administered intraoperatively, they should be actively warmed, particularly during procedures involving large-volume infusions or prolonged operative duration and used in combination with other active warming modalities (Grade 1A). Rationale Administration of room-temperature intravenous fluids represents a relevant source of heat loss during the per…	Comments Recom 11 (Only if "partially" or "completely disagree")	Recommendation 12. Selection of perioperative active warming strategies should be based on patient characteristics, procedural requirements, and local resource availability, prioritizing modalities with demonstrated efficacy and safety within the specific clinical context (Grade 1B). Rationale A wide range of perioperative warming strategies is available and can be broadly categorized into passiv…	Comments Recom 12 (Only if "partially" or "completely disagree")	Recommendation 13. Multimodal warming strategies combining active and passive measures should be used to prevent inadvertent perioperative hypothermia and its associated complications, particularly in patients at increased risk or undergoing prolonged or high-exposure procedures (Grade 1B). Rationale Evidence from randomized controlled trials and meta-analyses indicates that combining multiple wa…	Comments Recom 13 (Only if "partially" or "completely disagree")	Recommendation 14. Postoperative body temperature should be routinely measured and documented in all patients during post-anesthesia care to enable early detection and management of inadvertent perioperative hypothermia (Grade 1B). Rationale The incidence of UPH on admission to the post-anesthesia care unit (PACU) remains substantial, ranging between approximately 25% and 50% across published stu…	Comments Recom 14 (Only if "partially" or "completely disagree")	Recommendation 15. Active rewarming should be initiated in the post-anesthesia care unit or intensive care unit for all patients with a core body temperature below 36.0 °C and continued until normothermia or thermal comfort is achieved (Grade 1B). Rationale Once inadvertent perioperative hypothermia is identified in the postoperative period, prompt active rewarming is required to minimize physiol…	Comments Recom 15 (Only if "partially" or "completely disagree")	Recommendation 16. Assessment of thermal comfort should be incorporated as a routine component of perioperative patient-experience and quality-of-care evaluation (Grade 1C). Rationale Patient experience has been defined as “the sum of all interactions, shaped by an organization’s culture, that influence patient perceptions across the continuum of care.” According to the National Health Service (N…	Comments Recom 16 (Only if "partially" or "completely disagree")	Do you agree that your participation in this process may be included and published in an international consensus guideline, with full respect for the confidentiality of personal data and the maintenance of anonymity when necessary?	If you want to search any reference, please enter to this link: https://docs.google.com/document/d/1i4eL2_fibPtAEoE2Umw9I_ZBbXEYSYEeLQxoul5s0jg/edit?usp=sharing 2
2026-01-07 23:22:29	Fredy Ariza	Completely agree		Completely agree		Completely agree		Completely agree		Completely agree		Completele agree		Completely agree		Completely agree			Cpmpletely agree		Completely agree		Completely agree		Completely agree		Completely agree		Completely agree		Completely agree		Completely agree		Yes
2026-01-08 04:03:11	Fitsum Kifle	Partially agree	I would completely agree with this recommendation if a few additions are made to both the recommendation statement and the rationale. First, I suggest tightening the recommendation by explicitly emphasizing sustainability and system accountability. In particular, adding the term “maintain” strengthens the intent and reflects the need for ongoing implementation rather than one-time policy adoption…	Completely agree		Partially agree	I agree with this recommendation, but I suggest minor refinement to avoid unintended interpretation of the temperature thresholds. Emphasising active, exposure-focused management of ambient operating room temperature, with suggested minimum ranges rather than open-ended numeric targets, would better reflect the evidence. Explicitly telling adjustment once effective active warming is established w…	Partially agree	I agree with this recommendation, and I suggest clarifying its intent by explicitly linking risk identification to action. In particular, stating that standardized criteria or processes are established to guide targeted monitoring and thermoprotection strategies better reflects the underlying rationale and emphasizes that risk stratification is a means to improve care, not an end in itself. Hence…	Completely agree		Completele agree		Completely agree		Completely agree			Partially agree	I completely agree with the rationale, particularly the emphasis in the final paragraph on the importance of correct application, staff training, and standardized use protocols to ensure patient safety. To better align the recommendation with this systems-based perspective, I suggest refining the recommendation to read: “When active warming devices are available, their use should be integrated in…	Completely agree		Partially agree	I agree with the direction of this recommendation. However, given that the evidence consistently shows fluid warming provides modest benefits and is insufficient as a standalone intervention, alignment with a Grade 1B recommendation, or slight softening of the wording if retaining Grade 1A, would better reflect the strength and nature of the evidence. exmaple slight edits like this would help (if…	Completely agree		Completely agree		Completely agree		Partially agree	I agree with this recommendation. To better reflect variability in clinical context and avoid unintended rigidity, I suggest removing “for all patients” and clarifying that rewarming should generally continue until core temperature is ≥36.0 °C and the patient is thermally comfortable.	Partially agree	I agree, and I suggest this edit: where feasible depending on the patient's consciousness and mental status, let's advocate for simple patient-reported measures instead of complicated measurement tools; Assessment of thermal comfort should be incorporated as a routine component of perioperative patient-experience and quality-of-care evaluation, using simple patient-reported measures where feasibl…	Yes	I suggest including this on the first page. Congratulations on the great work and many thanks for the collaboration opportunity.
2026-01-08 08:58:19	Ana Crawford	Completely agree		Completely agree		Completely agree		Completely agree		Partially agree	Short cases and cases using MAC should be excluded as the benefit and use of resources may not be helpful.	Partially agree		Partially agree	Core temperature monitoring may not be available or feasible preop.	Partially agree			Cpmpletely agree		Partially agree		Partially agree		Completely agree		Completely agree		Completely agree		Completely agree		Completely agree		No
2026-01-08 09:38:19	Mauricio Giraldo	Completely agree		Completely agree		Completely agree		Partially agree		Completely agree		Partially agree		Completely agree		Partially agree			Cpmpletely agree		Completely agree		Completely agree		Completely agree		Completely agree		Completely agree		Completely agree		Completely agree		Yes
2026-01-08 17:05:41	Manuel Quintana-Diaz	Completely agree		Completely agree		Completely agree		Completely agree		Completely agree		Completele agree		Completely agree		Completely agree			Cpmpletely agree		Completely agree		Completely agree		Completely agree		Completely agree		Completely agree		Completely agree		Completely agree		Yes
2026-01-08 20:45:51	Nesrine Abdel-Rahman Elrefai	Completely agree		Completely agree		Completely agree		Completely agree		Completely agree		Completele agree		Partially agree		Partially agree		The references' link doesn't open.!	Cpmpletely agree		Partially agree		Completely agree		Completely agree		Completely agree		Completely agree		Completely agree		Partially agree		Yes
2026-01-09 08:57:48	Dr. Vaibhavi Upadhye	Completely agree		Completely agree		Completely agree		Completely agree		Completely agree		Completele agree		Completely agree		Completely agree			Cpmpletely agree		Completely agree		Completely agree		Completely agree		Completely agree		Completely agree		Completely agree		Completely agree		Yes
2026-01-11 18:08:52	Lucía Curiel Garrido	Completely agree		Completely agree		Partially agree	Although operating room temperature can be adjusted in many settings, precise control is often limited by centralized HVAC systems, thermal inertia, and predefined ranges. Frequent adjustments may compromise positive pressure, laminar airflow, air exchange etc. From a biomedical engineering perspective, environmental temperature control cannot replace patient-level active warming and should be co…	Completely agree		Partially agree	While the principle of core temperature monitoring is appropriate, invasive gold-standard methods are not always cost-effective. The recommendation does not clearly define when validated non-invasive continuous technologies are sufficient or specify minimum acceptable performance criteria. In the absence of clear technical thresholds, implementation may vary across institutions, leading to hetero…	Partially agree	While the proposed temperature range is appropriate as a general reference, enforcing a rigid target for all patients may lead to overtreatment, including unnecessary use of active warming devices, excessive alarms, or unintended overheating. I believe that temperature management should focus on preventing clinically relevant hypothermia using a dynamic, risk-adapted approach, rather than strict …	Completely agree		Partially agree	Strong evidence supports the effectiveness of active prewarming; however, routine universal implementation is often limited by logistical constraints, workflow impact, equipment availability, staffing, etc. Prewarming is therefore best applied in a targeted manner, prioritizing patients at moderate to high risk of hypothermia rather than indiscriminate use in all cases.		Cpmpletely agree		Completely agree		Completely agree		Completely agree		Completely agree		Completely agree		Partially agree	Active rewarming is appropriate for patients presenting with postoperative hypothermia; however, a rigid threshold-based approach (<36.0 °C for all patients) may lead to unnecessary device use in low-risk or mildly hypothermic cases	Completely agree		Yes
2026-01-11 21:41:30	Professor Tae-Yop Kim, MD, PhD	Completely agree		Completely agree		Completely agree		Completely agree		Completely agree		Completele agree		Completely agree		Completely agree			Cpmpletely agree		Completely agree		Completely agree		Completely agree		Completely agree		Completely agree		Completely agree		Completely agree		Yes	Thanks
2026-01-12 11:19:37	Juan Carlos Bocanegra Rivera	Completely agree		Completely agree		Completely agree		Completely agree		Completely agree		Completele agree		Completely agree		Completely agree			Cpmpletely agree		Completely agree		Completely agree		Completely agree		Completely agree		Completely agree		Completely agree		Completely agree		Yes
2026-01-12 14:53:49	Fernando Ríos Barbosa	Completely agree		Completely agree		Completely agree		Completely agree		Completely agree		Completele agree		Completely agree		Completely agree			Cpmpletely agree		Completely agree		Completely agree		Completely agree		Completely agree		Completely agree		Completely agree		Completely agree		Yes
2026-01-21 04:11:45	Klaus Görlinger	Completely agree		Completely agree		Completely agree		Partially agree		Completely agree		Completele agree		Completely agree		Completely agree			Cpmpletely agree		Completely agree		Completely agree		Completely agree		Completely agree		Completely agree		Completely agree		Completely agree		Yes
